# Supplementary material
Source: publisher figshare collection journal article supplement (https://karger.figshare.com/articles/dataset/_/4519676)
Supplement: Supplementary file 2 [file 1]

**Table S1:**

Functional results at the neonatal period in study groups and models.

| Neonatal period               |                  | <b>Control (n=39)</b> | <b>Case</b> | <b>p</b> |
|-------------------------------|------------------|-----------------------|-------------|----------|
| Tone (score)                  | <i>UN (n=38)</i> | 4 (0)                 | 4 (0)       | 1.000    |
|                               | <i>PU (n=38)</i> | 4 (0)                 | 3 (2)       | <0.001   |
| Posture (score)               | <i>UN (n=38)</i> | 3 (0)                 | 3 (0)       | 0.357    |
|                               | <i>PU (n=38)</i> | 3 (0)                 | 3 (1)       | 0.023    |
| Duration (score)              | <i>UN (n=38)</i> | 3 (1)                 | 3 (1)       | 0.638    |
|                               | <i>PU (n=38)</i> | 3 (0)                 | 3 (1)       | 0.007    |
| Circular motion (score)       | <i>UN (n=38)</i> | 3 (1)                 | 2 (1)       | 0.231    |
|                               | <i>PU (n=38)</i> | 2 (1)                 | 1 (2)       | <0.001   |
| Locomotion (score)            | <i>UN (n=38)</i> | 3 (0)                 | 3 (1)       | 0.243    |
|                               | <i>PU (n=38)</i> | 3 (0)                 | 2 (2)       | <0.001   |
| Lineal movement<br>(number)   | <i>UN (n=38)</i> | 3 (3)                 | 1 (3)       | 0.033    |
|                               | <i>PU (n=38)</i> | 3 (2)                 | 0 (1)       | <0.001   |
| Fore-hindpaw distance<br>(cm) | <i>UN (n=38)</i> | 3 (5)                 | 3 (7)       | 0.024    |
|                               | <i>PU (n=38)</i> | 3 (2)                 | 10 (5)      | <0.001   |
| Righting reflex<br>(number)   | <i>UN (n=38)</i> | 10 (0)                | 9.5 (2)     | 0.644    |
|                               | <i>PU (n=38)</i> | 10 (0)                | 8 (5)       | 0.039    |
| Suck&Swallow (score)          | <i>UN (n=38)</i> | 3 (0)                 | 3 (0)       | 0.357    |

|                            |                  |       |        |              |
|----------------------------|------------------|-------|--------|--------------|
|                            | <i>PU (n=38)</i> | 3 (0) | 3 (2)  | <i>0.008</i> |
| Smelling test<br>(seconds) | <i>UN (n=38)</i> | 5 (2) | 8 (10) | <i>0.551</i> |
|                            | <i>PU (n=38)</i> | 2 (4) | 3 (4)  | <i>0.099</i> |

Results are median and interquartile range (median (IQR)). Statistical comparisons between controls vs. cases for each model were performed by general linear models (GLM) after log-transformation of the variable was performed.

Abbreviations: UN= undernutrition; PU= placental underperfusion.
