# Supplementary material
Source: publisher figshare collection journal article supplement (https://karger.figshare.com/articles/dataset/_/4519676)
Supplement: Supplementary file 3 [file 1]

**Table S2:** Functional results at the long-term period in study groups and models.

| <b>Skinner</b>                           |                   | <b>Control (n=29)</b> | <b>Case</b> | <b>p</b> |
|------------------------------------------|-------------------|-----------------------|-------------|----------|
| Learning (%)                             | <i>UN (n= 25)</i> | 56%                   | 44%         | 0. 557   |
|                                          | <i>PU (n= 23)</i> | 77%                   | 30%         | 0.032    |
| <b>OFBT</b>                              |                   | <b>Control (n=25)</b> | <b>Case</b> | <b>p</b> |
| Latency (sec) <sup>†</sup>               | <i>UN (n= 32)</i> | 64 (171)              | 334 (319)   | 0.013    |
|                                          | <i>PU (n= 19)</i> | 59 (62)               | 192 (249)   | <0.001   |
| Internal boxes (numb) <sup>†</sup>       | <i>UN (n= 32)</i> | 11 (19)               | 5 (8)       | 0.014    |
|                                          | <i>PU (n= 19)</i> | 13 (10)               | 4 (5)       | <0.001   |
| External boxes (numb) <sup>†</sup>       | <i>UN (n= 32)</i> | 277 (177)             | 40 (66)     | <0.001   |
|                                          | <i>PU (n= 19)</i> | 60 (37)               | 36 (33)     | 0.020    |
| Total boxes explored (numb) <sup>†</sup> | <i>UN (n= 32)</i> | 301 (161)             | 53 (78)     | 0.001    |
|                                          | <i>PU (n= 19)</i> | 85 (53)               | 41 (35)     | 0.012    |
| <b>ORT</b>                               |                   | <b>Control (n=18)</b> | <b>Case</b> | <b>p</b> |
| Discriminatory index                     | <i>UN (n= 23)</i> | 0.3 (0.3)             | 0.0 (0.3)   | 0.080    |
|                                          | <i>PU (n= 17)</i> | 0.3 (0.2)             | -0.1 (0.3)  | <0.001   |

Results are median and interquartile range (median (IQR)). Statistical comparisons between controls vs. cases for each model were performed by general linear models (GLM). In non-normal variables (†), log-transformation of these variables were performed prior to GLM.

Abbreviations: OFBT: open field behavioral test; ORT: object recognition task;  
UN= undernutrition; PU= placental underperfusion; Sec: seconds; Numb:  
number.
