# Supplementary material
Source: publisher figshare collection journal article supplement (https://karger.figshare.com/articles/dataset/_/4519676)
Supplement: Supplementary file 4 [file 1]

Archive with 4 entries (4 files):
- 454859sm_2.pdf
- 454859_sm1.pdf
- 454859_sm3.pdf
- 454859_sm4.pdf
