# Supplementary material
Source: publisher figshare collection journal article supplement (https://karger.figshare.com/articles/dataset/_/4519676)
Supplement: Supplementary file 4 [file 1 › 454859_sm4.pdf]

**Table S3:**

Mean correlation coefficients between neurobehavioral items results and FA-weighted network features.

|                     |                |           | <b>FA-weighted</b>      |                          |                         |
|---------------------|----------------|-----------|-------------------------|--------------------------|-------------------------|
|                     |                |           | <b>Average strength</b> | <b>Global efficiency</b> | <b>Local efficiency</b> |
| <b>OFBT</b>         | Latency        | <i>UN</i> | <b>-0.82**</b>          | <b>-0.73**</b>           | <b>-0.64*</b>           |
|                     |                | <i>PU</i> | <b>-0.50*</b>           | -0.43                    | -0.42                   |
|                     | Internal boxes | <i>UN</i> | <b>0.58*</b>            | <b>0.65*</b>             | <b>0.61*</b>            |
|                     |                | <i>PU</i> | <b>0.64*</b>            | <b>0.63*</b>             | <b>0.66*</b>            |
|                     | External boxes | <i>UN</i> | <b>0.80**</b>           | <b>0.83**</b>            | <b>0.77**</b>           |
|                     |                | <i>PU</i> | 0.45                    | 0.39                     | 0.38                    |
|                     | Total boxes    | <i>UN</i> | <b>0.78*</b>            | <b>0.82**</b>            | <b>0.76*</b>            |
|                     |                | <i>PU</i> | 0.44                    | 0.39                     | 0.38                    |
| <b>ORT</b>          | DI             | <i>UN</i> | 0.14                    | 0.12                     | 0.03                    |
|                     |                | <i>PU</i> | 0.47                    | 0.50                     | 0.38                    |
| <b>Skinner test</b> | % of learning  | <i>UN</i> | 0.32                    | 0.24                     | 0.33                    |
|                     |                | <i>PU</i> | 0.38                    | 0.38                     | 0.25                    |

Association of network features with functional results was performed by means of a partial correlation in quantitative variables or GLM in categorical variables.

Abbreviations: OFBT: open field behavioral test; ORT: object recognition task;  
DI: discriminatory index; UN: undernutrition; PU: placental underperfusion.

\* $p < 0.05$

\*\* $p < 0.01$
